# Supplementary figures and images for: First Report of Blood Fluke Pathogens with Potential Risk for Emerging Yellowtail Kingfish (Seriola lalandi) Aquaculture on the Chilean Coast, with Descriptions of Two New Species of Paradeontacylix (Aporocotylidae)
Source: MDPI journal article supplement (doi:10.3390/pathogens10070849), 2021-07-06

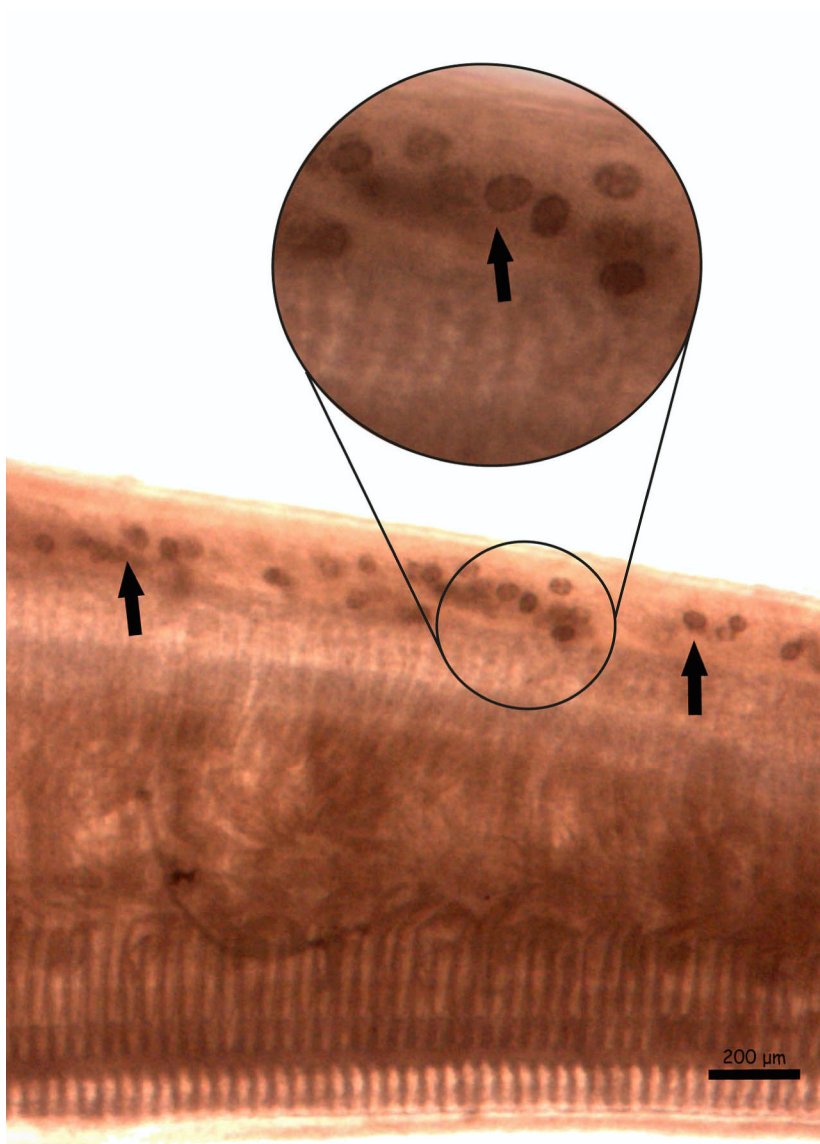

Supplement: s1 [file s1]
